# Supplementary material
Source: publisher site journal article supplement (https://www.dovepress.com/article/267993)
Supplement: Supplementary file 1 [file get_supplementary_file.php]

## Appendix A. International Classification of Diseases, Tenth Revision Codes used for Enterprise Data Warehouse report

Codes used for type 1 and type 2 diabetes:

'E08.3129','E08.3211','E08.3212','E08.3213','E08.3291','E08.3292','E08.3293','E08.3311','E08.3312','E08.3313','E08.3319','E08.3391','E08.3392','E08.3393','E08.3399','E08.3411','E08.3412','E08.3413','E08.3419','E08.3491','E08.3492','E08.3493','E08.3499','E08.3511','E08.3512','E08.3513','E08.3519','E08.3521','E08.3522','E08.3523','E08.3529','E08.3531','E08.3532','E08.3533','E08.3541','E08.3542','E08.3543','E08.3549','E08.3551','E08.3552','E08.3553','E08.3559','E08.3591','E08.3592','E08.3593','E08.3599','E08.37X1','E08.37X2','E08.37X9','E08.3939','E09.3211','E09.3212','E09.3213','E09.3219','E09.3291','E09.3292','E09.3293','E09.3299','E09.3311','E09.3312','E09.3313','E09.3319','E09.3391','E09.3392','E09.3393','E09.3399','E09.3411','E09.3412','E09.3413','E09.3419','E09.3491','E09.3492','E09.3493','E09.3499','E09.3511','E09.3512','E09.3513','E09.3519','E09.3521','E09.3522','E09.3523','E09.3529','E09.3531','E09.3532','E09.3533','E09.3539','E09.3541','E09.3542','E09.3543','E09.3549','E09.3551','E09.3552','E09.3553','E09.3559','E09.3591','E09.3592','E09.3593','E09.3599','E09.37X1','E09.37X2','E09.37X3','E09.37X9','E10.3211','E10.3212','E10.3213','E10.3219','E10.3291','E10.3292','E10.3293','E10.3299','E10.3311','E10.3312','E10.3313','E10.3319','E10.3391','E10.3392','E10.3393','E10.3399','E10.3411','E10.3412','E10.3413','E10.3419','E10.3491','E10.3492','E10.3493','E10.3499','E10.3511','E10.3512','E10.3513','E10.3519','E10.3521','E10.3522','E10.3523','E10.3529','E10.3531','E10.3532','E10.3533','E10.3539','E10.3541','E10.3542','E10.3543','E10.3549','E10.3551','E10.3552','E10.3553','E10.3559','E10.3591','E10.3592','E10.3593','E10.3599','E10.37X1','E10.37X2','E10.37X3','E10.37X9','E10.9','E11.3211','E11.3212','E11.3213','E11.3219','E11.3291','E11.3292','E11.3293','E11.3299','E11.3311','E11.3312','E11.3313','E11.3319','E11.3391','E11.3392','E11.3393','E11.3399','E11.3411','E11.3412','E11.3413','E11.3419','E11.3491','E11.3492','E11.3493','E11.3499','E11.3511','E11.3512','E11.3513','E11.3519','E11.3521','E11.3522','E11.3523','E11.3529','E11.3531','E11.3532','E11.3533','E11.3539','E11.3541','E11.3542','E11.3543','E11.3549','E11.3551','E11.3552','E11.3553','E11.3559','E11.3591','E11.3592','E11.3593','E11.3599','E11.37X1','E11.37X2','E11.37X3','E11.37X9','E11.9','E13.3211','E13.3212','E13.3213','E13.3219','E13.3291','E13.3292','E13.3293','E13.3299','E13.3311','E13.3312','E13.3313','E13.3319','E13.3391','E13.3392','E13.3393','E13.3399','E13.3411','E13.3412','E13.3413','E13.3419','E13.3491','E13.3492','E13.3493','E13.3499','E13.3511','E13.3512','E13.3513','E13.3519','E13.3521','E13.3522','E13.3523','E13.3529','E13.3531','E13.3532','E13.3533','E13.3539','E13.3541','E13.3542','E13.3543','E13.3549','E13.3551','E13.3552','E13.3553','E13.3559','E13.3591','E13.3592','E13.3593','E13.3599','E13.37X1','E13.37X2','E13.37X3','E13.37X9','E8.3299'

Codes used for presence of DR:

'E10.319','E11.319'

## Appendix B. Full version of survey sent to patients

### I. Demographics

1. Ethnic origin (*check only one*):
  - White not Hispanic
  - Black not Hispanic
  - Hispanic
  - Asian or Pacific Islander
  - American Indian/Alaskan Native
  - Other:
  - Prefer not to answer
2. Sex:
  - Male
  - Female
  - Other:
  - Prefer not to answer
3. Please indicate the **highest** level of education you have completed:
  - Elementary/Middle School
  - High School or GED equivalent
  - Bachelor's degree
  - Master's degree or above
  - Prefer not to answer
4. Are you currently (*Check only one*):
  - Married
  - Single
  - Separated
  - Widowed
  - Divorced
  - Prefer not to answer

### II. Diabetes Background

5. How long have you been diagnosed with diabetes?
  - Less than 5 years
  - 5-10 years

- More than 10 years
  - Unsure
6. Are you on any medications for diabetes treatment?
- Yes—Please specify:
    - Oral medication
    - Insulin
    - Both
  - No
7. Do you have a family history of diabetes?
- Yes
  - No
8. Where do you receive information about your diabetes?
- My doctor(s)
    - Please specify:
      - Primary Care Physician
      - Ophthalmologist
      - Endocrinologist
      - Other
  - The Internet
  - Friends and relatives
9. In the past 12 months, have you seen any of the following for diabetes-related care? (select all that apply):
- Primary Care Physician
  - Endocrinologist
  - Ophthalmologist
  - All of the above
  - None of the above

|                                            |
|--------------------------------------------|
| <b>III. Diabetic Retinopathy Awareness</b> |
|--------------------------------------------|

10. Are you aware that diabetes can affect your vision?
- Yes
  - No
11. Are you aware that diabetes can lead to blindness?
- Yes
  - No

12. Do you know what diabetic retinopathy means?

- Yes
- No

13. Do you think blood sugar control can decrease the risk of diabetic retinopathy?

- Yes
- No

14. As someone with diabetes, do you think it is important to receive regular eye exams?

- Yes
  - If so, how often?
    - Every 6 months
    - Once a year
    - Every 2 years
    - As needed
    - Never
- No

15. Have you ever been told that diabetes is affecting your eyes, specifically, your retinas?

- Yes
- No
  - If so, to what extent is it affecting your eyes (please make your best guess if unsure):
    - Mild
    - Moderate
    - Severe

16. Have you ever been told that fluid is affecting your vision?

- Yes
- No

17. Have you ever been told that you have new or abnormal blood vessels?

- Yes
- No

#### IV. Diabetic Retinopathy Treatment

18. Have you ever received laser treatment for diabetes?

- Yes
- No

If so, was this to (*circle all that apply*):

- Prevent diabetes
- Treat a diabetic-related disease

- Improve vision
- Treat fluid affecting vision
- Treat new or abnormal blood vessels
- All of the above

19. Have you ever received eye injections for diabetes?

- Yes
- No

If so, was this to (*circle all that apply*):

- Prevent diabetes
- Treat a diabetic-related disease
- Improve vision
- Treat fluid affecting vision
- Treat new or abnormal blood vessels
- All of the above

|                      |
|----------------------|
| <b>V. Compliance</b> |
|----------------------|

20. Do you take your diabetes medications as instructed?

- Yes
- No

21. Do you monitor your blood sugar at home?

- Yes

If so, how often:

- Throughout the day
- Once a day
- Once a week
- Once a month
- When feeling unwell

- No

22. Is your blood sugar (glucose) well controlled?

- Yes
- No
- Fluctuates

23. What was your last A1c measurement?

- Less than 7
- Greater than 7
- Don't know

24. When was your last eye exam?

- Within the last 0 - 1 year
- Within the last 1 - 2 years
- More than 2 years ago
- Never

25. What makes it hard to get routine examinations (Check all that apply)?

- Lack of information
- Lack of time
- Limited access to doctor
- Cost
- Fear of finding something bad
- Lack of transportation
- Other, please explain:

26. Do you feel your eye doctor has explained your diabetic eye treatment well?

- Yes
- No
  - If no, why:
